# Supplementary material for: Photoinduced stepwise bending behavior of photochromic diarylethene crystals
Source: Royal Society of Chemistry journal article supplement (doi:10.1039/c6ce00607h), 2016-01-01
Supplement: c6ce00607h1.pdf [file c6ce00607h1.pdf]

## Supporting Information:

### **Photoinduced stepwise bending behavior of photochromic diarylethene crystals**

*Daichi Kitagawa, Rika Tanaka, and Seiya Kobatake\**

*Department of Applied Chemistry, Graduate School of Engineering, Osaka City University, 3-3-138  
Sugimoto, Sumiyoshi-ku, Osaka 558-8585, Japan*

\*E-mail: kobatake@a-chem.eng.osaka-cu.ac.jp

## Contents:

### Experimental Section

**Figure S1.** Crystal shape of **1a** (a) and molecular packing diagrams viewed from cross section (b), (1 0  $\bar{1}$ ) face (c), and (0 0  $\bar{1}$ ) face (d).

**Figure S2.** Photographs of crystal **1a** before and after UV light irradiation, viewed from (0 0  $\bar{1}$ ) face (a) and absorption spectra of the colored crystal under polarized light (b), and polar plots of absorbance at 590 nm (c).

**Figure S3.** Change in the curvature relative to irradiation time with UV light in each cycle.

**Figure S4.** Photograph of the manual bending of crystal **1a**.

**Figure S5.** Melting behavior of crystal **1a** at a heating rate of 1 °C min<sup>-1</sup>.

**Figure S6.** Melting behavior of crystal **1a** after many cycles of alternating irradiation with UV and visible light at a heating rate of 1 °C min<sup>-1</sup>.

**Figure S7.** DSC curves of crystal **1a** (a) before and (b) after several cycles, and (c) many cycles of alternating irradiation with UV and visible light at a heating rate of 5 °C min<sup>-1</sup>.

**Table S1.** X-ray crystallographic data of **1a**.<sup>[S1]</sup>

**Video S1.** Photoinduced stepwise bending behavior of crystal **1a**. The movie was taken in the real time.

**Video S2.** Photoinduced stepwise bending behavior of crystal **1a** after 100 repeating cycles in the first step. The bent crystal returned to the initial straight crystal upon irradiation with visible light. The movie is fast-forwarded as much as 16 times on the way.

**Video S3.** Crystal bending behavior of crystal **1a** when UV light was turned on and off on the way in the second step. The movie is fast-forwarded as much as twice.

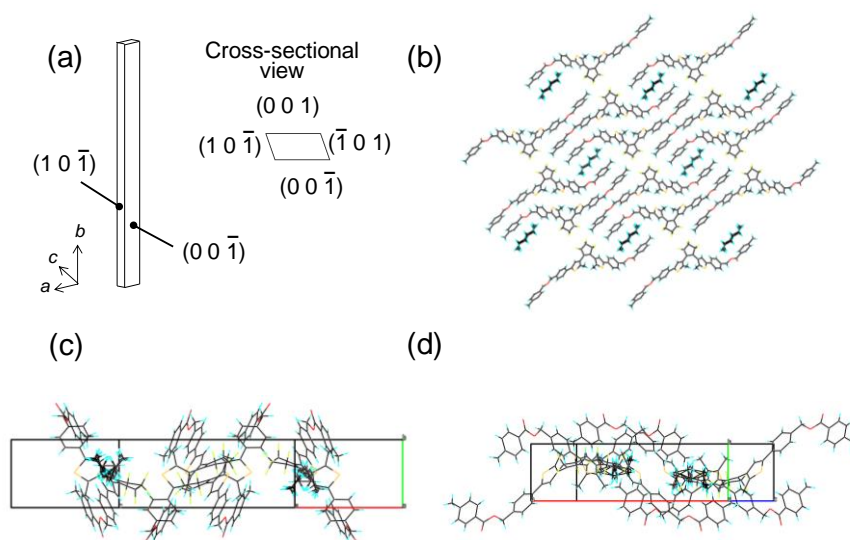

**Figure S1.** Crystal shape of **1a** (a) and molecular packing diagrams viewed from cross section (b),  $(1\ 0\ \bar{1})$  face (c), and  $(0\ 0\ \bar{1})$  face (d).

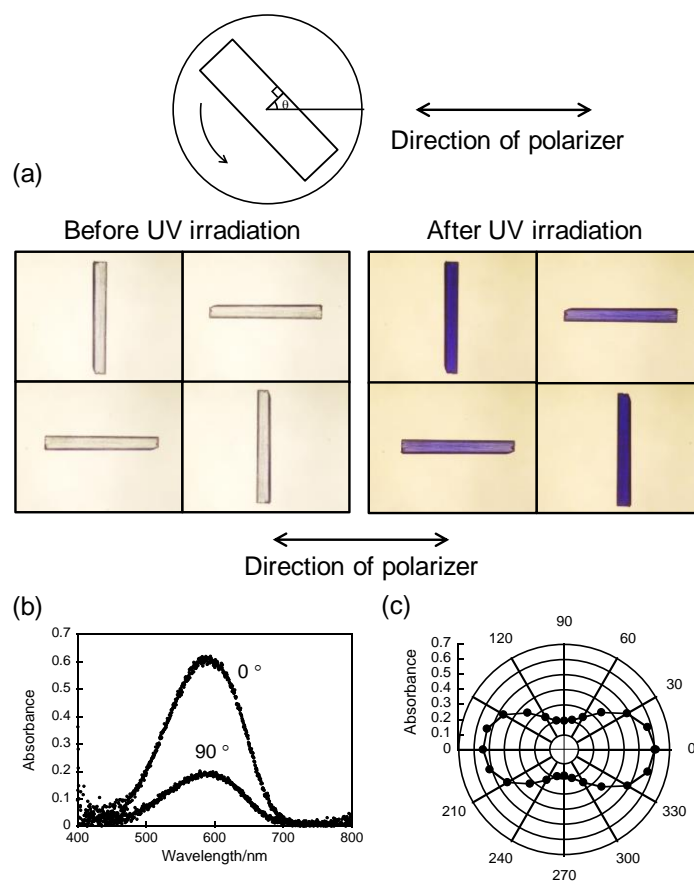

**Figure S2.** Photographs of crystal **1a** before and after UV light irradiation, viewed from  $(0\ 0\ \bar{1})$  face (a) and absorption spectra of the colored crystal under polarized light (b), and polar plots of absorbance at 590 nm (c).

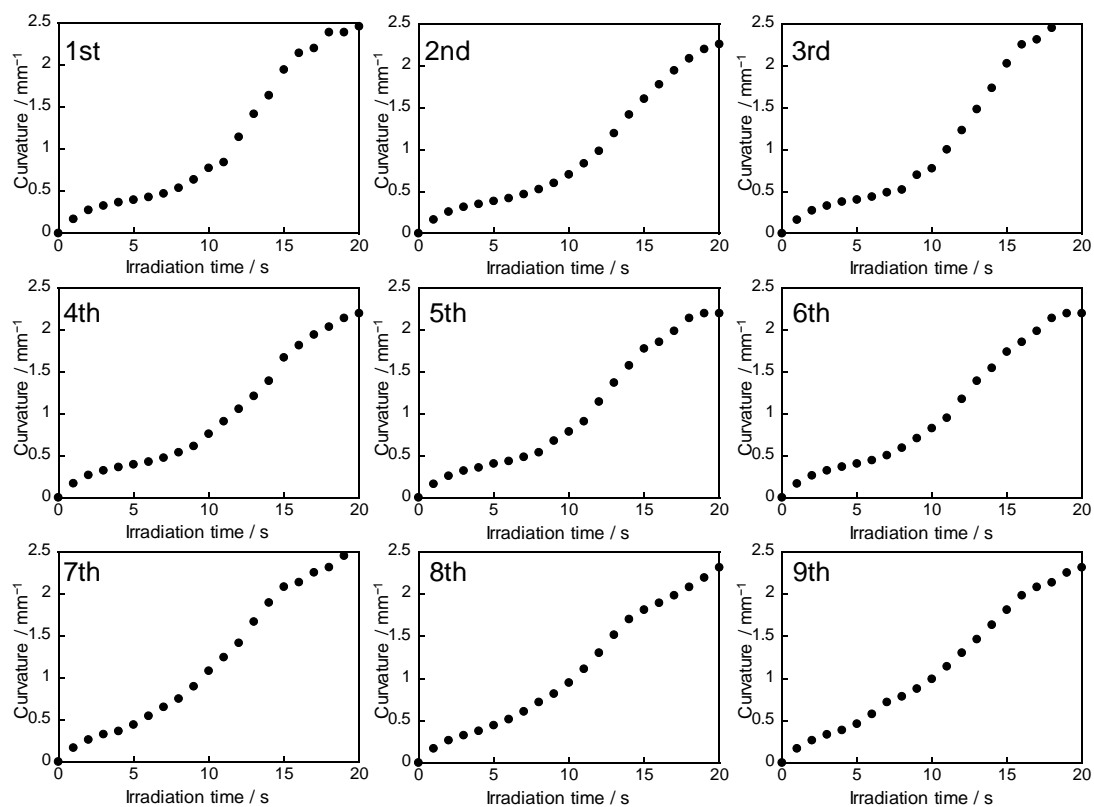

**Figure S3.** Change in the curvature relative to irradiation time with UV light in each cycle.

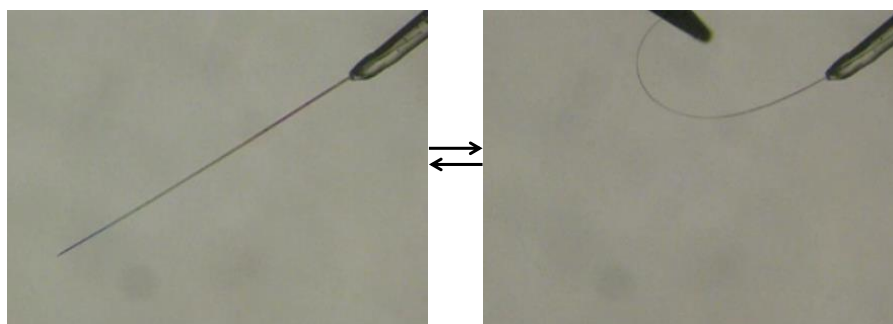

**Figure S4.** Photograph of the manual bending of crystal **1a**.

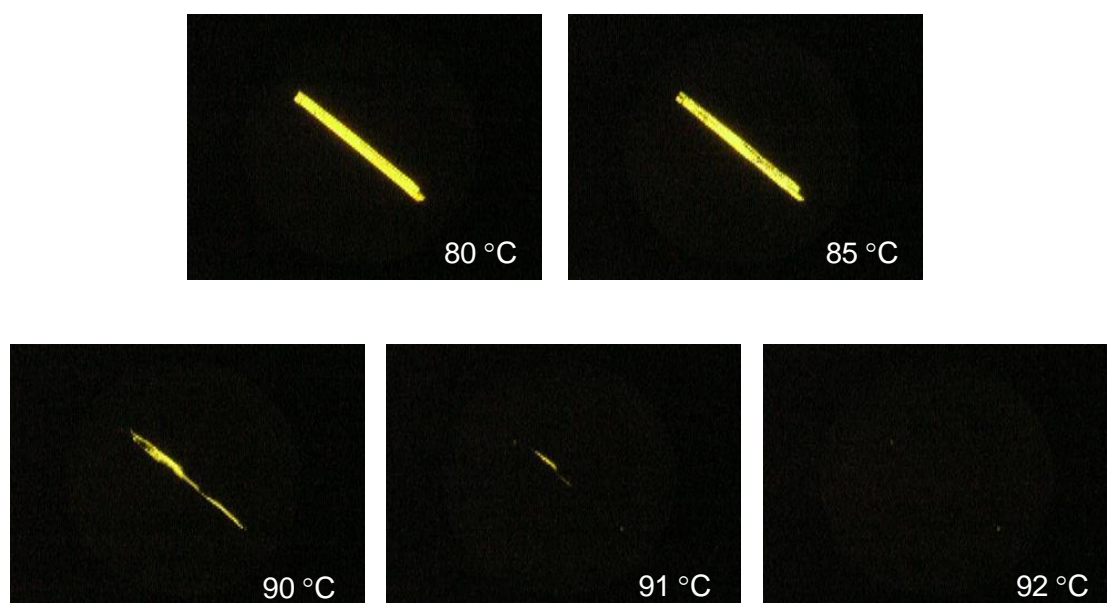

**Figure S5.** Melting behavior of crystal **1a** at a heating rate of  $1\text{ °C min}^{-1}$ .

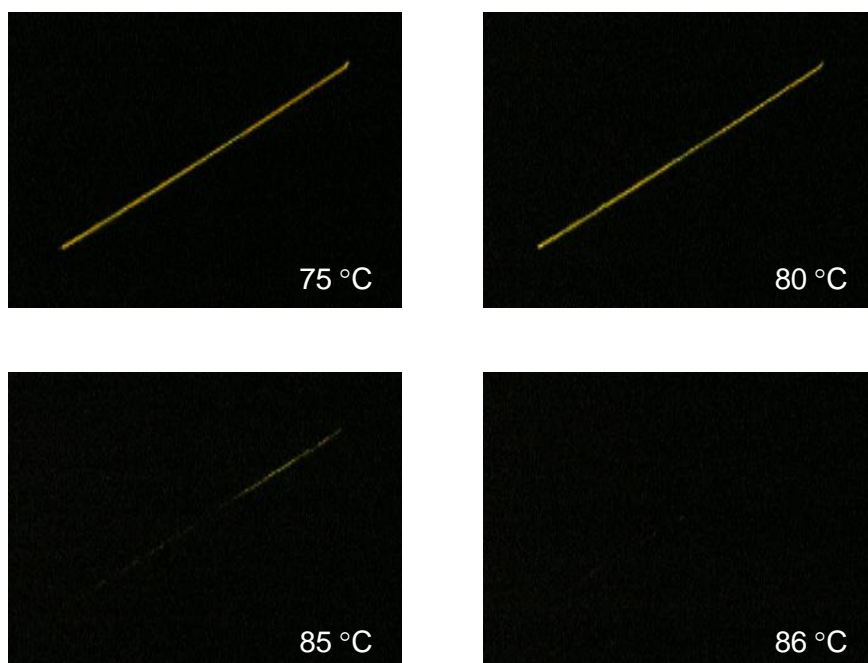

**Figure S6.** Melting behavior of crystal **1a** after many cycles of alternating irradiation with UV and visible light at a heating rate of  $1\text{ }^{\circ}\text{C min}^{-1}$ .

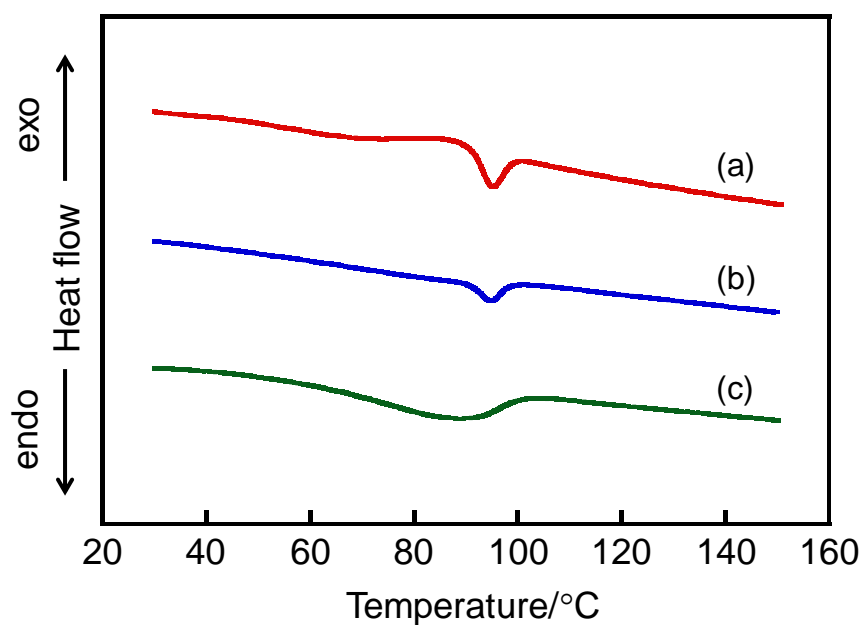

**Figure S7.** DSC curves of crystal **1a** (a) before and (b) after several cycles, and (c) many cycles of alternating irradiation with UV and visible light at a heating rate of  $5\text{ }^{\circ}\text{C min}^{-1}$ .

**Table S1.** X-ray crystallographic data of **1a**.<sup>[S1]</sup>

|                                | <b>1a</b>                                                                                                               |
|--------------------------------|-------------------------------------------------------------------------------------------------------------------------|
| Empirical formula              | C <sub>45</sub> H <sub>34</sub> F <sub>6</sub> O <sub>4</sub> S <sub>2</sub> , C <sub>3</sub> H <sub>7</sub>            |
| Formula weight                 | 859.93                                                                                                                  |
| Temperature                    | 120(2) K                                                                                                                |
| Crystal system                 | Monoclinic                                                                                                              |
| Space group                    | <i>P2/n</i>                                                                                                             |
| Unit cell dimensions           | $a = 21.493(10) \text{ \AA}$<br>$b = 6.174(3) \text{ \AA}$<br>$c = 32.059(15) \text{ \AA}$<br>$\beta = 98.765(6)^\circ$ |
| Volume                         | 4205(3) $\text{\AA}^3$                                                                                                  |
| <i>Z</i>                       | 4                                                                                                                       |
| Density                        | 1.358 g/cm <sup>3</sup>                                                                                                 |
| Crystal size                   | 0.36 × 0.22 × 0.01 mm <sup>3</sup>                                                                                      |
| Goodness-of-fit on $F^2$       | 1.077                                                                                                                   |
| Final $R$ [ $I > 2\sigma(I)$ ] | $R1 = 0.0564$ , $wR2 = 0.1231$                                                                                          |
| $R$ (all data)                 | $R1 = 0.0806$ , $wR2 = 0.1346$                                                                                          |

## Reference

- S1. D. Kitagawa, C. Iwaihara, H. Nishi, S. Kobatake, *Crystals* **2015**, *5*, 551-561.
